# Supplementary material for: Frailty Is Associated With Cognitive Decline Independent of Cerebral Small Vessel Disease and Brain Atrophy
Source: PubMed Central journal article supplement — J Gerontol A Biol Sci Med Sci. 2022 Apr 1;77(9):1819–26. doi: 10.1093/gerona/glac078 (PMC9434440; doi:10.1093/gerona/glac078), 2022-04-01
Supplement: glac078_suppl_supplementary_material.pdf [file glac078_suppl_supplementary_material.pdf]

**Supplementary Table 1: Frailty Index variables**

| Variable                              | Deficit coding                | n (%)   |      |
|---------------------------------------|-------------------------------|---------|------|
| <b>Self-reported medical history:</b> |                               |         |      |
| Hypertension                          | no =0, yes = 1                | 193/385 | 50.1 |
| Angina pectoris                       | no =0, yes = 1                | 53/384  | 13.8 |
| Myocardial infarction                 | no =0, yes = 1                | 47/385  | 12.2 |
| Dyslipidemia                          | no =0, yes = 1                | 164/385 | 42.6 |
| Diabetes Mellitus                     | no =0, yes = 1                | 45/385  | 11.7 |
| Stroke                                | no =0, yes = 1                | 29/385  | 7.5  |
| Migraine                              | no =0, yes = 1                | 59/385  | 15.3 |
| History of falls                      | no =0, yes = 1                | 65/384  | 16.9 |
| Arthritis                             | no =0, yes = 1                | 215/381 | 56.4 |
| <b>Sensorimotor function:</b>         |                               |         |      |
| Postural Sway eyes open (mm)          | <27 = 0, >27 = 1              | 79/383  | 20.6 |
| Postural Sway eyes closed (mm)        | <54.2 = 0, >54.2 = 1          | 71/382  | 18.4 |
| Lower Limb Strength (kg)              |                               | 84/380  | 22.1 |
| Male                                  | >27 = 0, <27 = 1              |         |      |
| Female                                | >18 = 0, <18 = 1              |         |      |
| Visual contrast (dB units)            | <19 = 0, >19 = 1              | 111/385 | 28.8 |
| Proprioception (degrees)              | <2.4 = 0, >2.4 = 1            | 81/384  | 21.1 |
| Reaction Time (ms)                    | <255.1 = 0, >255.1 = 1        | 74/384  | 19.3 |
| <b>Other measures</b>                 |                               |         |      |
| Geriatric Depression Scale            | <6 = 0, ≥6 = 1                | 9/374   | 2.3  |
| Steps per day (no.)                   | >3219 = 0, <3219 = 1          | 68/357  | 19.1 |
| Activities of daily living            | >21 = 0, <21 = 1              | 20/384  | 5.2  |
| Gait speed (cm/s)                     | >80 = 0, <80 = 1              | 23/375  | 6.1  |
| Grip strength (psi)                   |                               | 78/38   | 20.3 |
| Male                                  | >8 = 0, <8 = 1                |         |      |
| Female                                | >5.5 = 0, <5.5 = 1            |         |      |
| BMI (kg/m <sup>2</sup> )              | 18.5-35 = 0, <18.5 or >35 = 1 | 25/384  | 6.5  |
| 15-item AQoL*                         | 1 = 0, 2 = 0.5, 3 and 4 = 1   | 3.71    | 2.19 |

\*AQoL, Adjusted Quality of Life 15-item questionnaire; presented as mean, *SD*, as scored for the frailty index

**Supplementary table 2: MRI measures at baseline and cognitive domains over time**

| <b>Cerebral small vessel disease (n)</b> |             |         |                |         |         |                |         |
|------------------------------------------|-------------|---------|----------------|---------|---------|----------------|---------|
|                                          |             | Model 1 |                |         | Model 2 |                |         |
|                                          |             | Beta    | 95% CI         | p value | Beta    | 95% CI         | p value |
| <b>Global cognition</b>                  |             |         |                |         |         |                |         |
|                                          | Time        | -0.04   | -0.06, -0.03   | <0.001  | 0.004   | -0.018, 0.026  | 0.71    |
|                                          | cSVD        | -0.19   | -0.28, -0.1    | <0.001  | -0.053  | -0.140, 0.035  | 0.24    |
|                                          | cSVD × Time | -0.018  | -0.03, -0.005  | 0.004   | -0.019  | -0.031, -0.007 | 0.003   |
| <b>Attention and processing speed</b>    |             |         |                |         |         |                |         |
|                                          | Time        | -0.005  | -0.02, 0.01    | 0.59    | 0.049   | 0.028, 0.071   | <0.001  |
|                                          | cSVD        | -0.19   | -0.28, -0.1    | <0.001  | -0.042  | -0.126, 0.043  | 0.034   |
|                                          | cSVD × Time | -0.02   | -0.03, -0.004  | 0.011   | -0.017  | -0.030, -0.005 | 0.007   |
| <b>Visuospatial ability</b>              |             |         |                |         |         |                |         |
|                                          | Time        | -0.31   | -0.35, -0.27   | <0.001  | -0.277  | -0.322, -0.231 | <0.001  |
|                                          | cSVD        | -0.18   | -0.28, -0.08   | <0.001  | -0.088  | -0.189, 0.012  | 0.08    |
|                                          | cSVD × Time | -0.03   | -0.07, -0.003  | 0.03    | -0.036  | -0.067, -0.006 | 0.02    |
| <b>Executive function</b>                |             |         |                |         |         |                |         |
|                                          | Time        | -0.001  | -0.04, 0.24    | 0.58    | 0.015   | -0.020, 0.051  | 0.67    |
|                                          | cSVD        | -0.15   | -0.23, -0.06   | 0.001   | -0.076  | -0.163, 0.012  | 0.09    |
|                                          | cSVD × Time | 0.007   | -0.017, 0.03   | 0.59    | 0.005   | -0.019, 0.029  | 0.67    |
| <b>Verbal fluency</b>                    |             |         |                |         |         |                |         |
|                                          | Time        | 0.02    | 0.002, 0.047   | 0.04    | 0.052   | 0.026, 0.078   | <0.001  |
|                                          | cSVD        | -0.14   | -0.23, -0.05   | 0.002   | -0.050  | -0.141, 0.042  | 0.29    |
|                                          | cSVD × Time | -0.013  | -0.029, 0.003  | 0.10    | -0.014  | -0.029, 0.002  | 0.09    |
| <b>Working memory</b>                    |             |         |                |         |         |                |         |
|                                          | Time        | 0.02    | -0.004, 0.05   | 0.1     | 0.034   | 0.006, 0.063   | 0.02    |
|                                          | cSVD        | -0.07   | -0.16, 0.017   | 0.11    | -0.023  | -0.117, 0.070  | 0.62    |
|                                          | cSVD × Time | 0.001   | -0.017, 0.018  | 0.94    | -0.001  | -0.018, 0.017  | 0.97    |
| <b>Verbal memory</b>                     |             |         |                |         |         |                |         |
|                                          | Time        | 0.057   | 0.03, 0.08     | <0.001  | 0.095   | 0.066, 0.124   | <0.001  |
|                                          | cSVD        | -0.13   | -0.22, -0.04   | 0.006   | -0.005  | -0.089, 0.079  | 0.91    |
|                                          | cSVD × Time | -0.01   | -0.03, 0.007   | 0.25    | -0.012  | -0.030, 0.007  | 0.22    |
| <b>Visual memory</b>                     |             |         |                |         |         |                |         |
|                                          | Time        | -0.15   | -0.17, -0.12   | <0.001  | -0.112  | -0.142, -0.083 | <0.001  |
|                                          | cSVD        | -0.13   | -0.21, 0.04    | 0.004   | -0.040  | -0.126, 0.045  | 0.36    |
|                                          | cSVD × Time | -0.009  | -0.028, 0.01   | 0.33    | -0.011  | -0.030, 0.008  | 0.25    |
| <b>Grey matter volume (mL)</b>           |             |         |                |         |         |                |         |
|                                          |             | Model 1 |                |         | Model 2 |                |         |
|                                          |             | Beta    | 95% CI         | p value | Beta    | 95% CI         | p value |
| <b>Global cognition</b>                  |             |         |                |         |         |                |         |
|                                          | Time        | -0.142  | -0.259, -0.025 | 0.02    | -0.107  | -0.223, 0.009  | 0.07    |

|                                |            |         |                 |        |         |                 |        |
|--------------------------------|------------|---------|-----------------|--------|---------|-----------------|--------|
|                                | GMV        | 0.005   | 0.003, 0.007    | <0.001 | 0.006   | 0.003, 0.009    | <0.001 |
|                                | GMV × Time | 0.0002  | -0.001, 0.0003  | 0.18   | 0.0001  | -0.0001, 0.0003 | 0.18   |
| Attention and processing speed |            |         |                 |        |         |                 |        |
|                                | Time       | -0.080  | -0.201, 0.041   | 0.19   | -0.041  | -0.161, 0.078   | 0.50   |
|                                | GMV        | 0.005   | 0.004, 0.007    | <0.001 | 0.006   | 0.003, 0.009    | <0.001 |
|                                | GMV × Time | 0.0001  | -0.0001, 0.0003 | 0.34   | 0.0002  | -0.0001, 0.0003 | 0.32   |
| Visuospatial ability           |            |         |                 |        |         |                 |        |
|                                | Time       | -0.352  | -0.653, -0.051  | 0.02   | -0.327  | -0.625, -0.028  | 0.03   |
|                                | GMV        | 0.005   | 0.003, 0.007    | <0.001 | 0.004   | 0.001, 0.007    | 0.03   |
|                                | GMV × Time | 0.0001  | -0.0005, 0.0005 | 0.96   | 0.0001  | -0.0005, 0.0005 | 0.96   |
| Executive function             |            |         |                 |        |         |                 |        |
|                                | Time       | -0.048  | -0.271, 0.174   | 0.67   | -0.035  | -0.258, 0.188   | 0.76   |
|                                | GMV        | 0.002   | 0.001, 0.004    | 0.01   | 0.003   | 0.001, 0.006    | 0.03   |
|                                | GMV × Time | 0.0001  | -0.0003, 0.0005 | 0.68   | 0.0001  | -0.0003, 0.0005 | 0.66   |
| Verbal fluency                 |            |         |                 |        |         |                 |        |
|                                | Time       | 0.054   | -0.097, 0.204   | 0.48   | 0.061   | -0.089, 0.211   | 0.42   |
|                                | GMV        | 0.004   | 0.003, 0.006    | <0.001 | 0.008   | 0.004, 0.011    | <0.001 |
|                                | GMV × Time | -0.0001 | -0.0004, 0.0001 | 0.58   | -0.0001 | -0.0003, 0.0002 | 0.59   |
| Working memory                 |            |         |                 |        |         |                 |        |
|                                | Time       | 0.005   | -0.163, 0.173   | 0.96   | 0.012   | -0.156, 0.181   | 0.89   |
|                                | GMV        | 0.004   | 0.002, 0.005    | <0.001 | 0.003   | -0.001, 0.006   | 0.08   |
|                                | GMV × Time | 0.0001  | -0.0003, 0.0003 | 0.84   | 0.0001  | -0.0003, 0.0003 | 0.98   |
| Verbal memory                  |            |         |                 |        |         |                 |        |
|                                | Time       | -0.027  | -0.202, 0.148   | 0.76   | 0.001   | -0.174, 0.175   | 0.99   |
|                                | GMV        | 0.002   | 0.001, 0.004    | 0.02   | 0.004   | 0.001, 0.007    | 0.005  |
|                                | GMV × Time | 0.0001  | -0.0002, 0.0005 | 0.41   | 0.0001  | -0.0002, 0.0005 | 0.42   |
| Visual memory                  |            |         |                 |        |         |                 |        |
|                                | Time       | -0.147  | -0.327, 0.033   | 0.11   | -0.130  | -0.310, 0.051   | 0.16   |
|                                | GMV        | 0.005   | 0.003, 0.007    | <0.001 | 0.004   | 0.001, 0.007    | 0.02   |
|                                | GMV × Time | -0.0001 | -0.0003, 0.0003 | 0.93   | -0.0001 | -0.0003, 0.0003 | 0.99   |

Model 1: unadjusted model

Model 2: adjusted for age, sex, level of education, additionally adjusted for total intracranial volume in GMV models

Abbreviations: 95% CI, 95% confidence intervals; cSVD, cerebral small vessel disease; GMV gray matter volume

**Supplementary table 3: associations between MRI measures and cognitive domains over time stratified by baseline frailty status, adjusting for age, sex and years of formal education and additionally adjusting for total intracranial volume in grey matter models**

|                                          | Low frailty (<0.26) |                 |         | High frailty (>0.26) |                 |         |
|------------------------------------------|---------------------|-----------------|---------|----------------------|-----------------|---------|
|                                          | Beta                | 95% CI          | p value | Beta                 | 95% CI          | p value |
| <b>Cerebral small vessel disease (n)</b> |                     |                 |         |                      |                 |         |
| Attention and processing speed           |                     |                 |         |                      |                 |         |
| Time                                     | 0.053               | 0.030, 0.077    | <0.001  | 0.011                | -0.041, 0.063   | 0.68    |
| cSVD                                     | 0.026               | -0.069, 0.122   | 0.59    | -0.044               | -0.208, 0.120   | 0.60    |
| cSVD × Time                              | -0.022              | -0.037, -0.007  | 0.004   | -0.008               | -0.033, 0.017   | 0.53    |
| Visuospatial ability                     |                     |                 |         |                      |                 |         |
| Time                                     | -0.279              | -0.334, -0.224  | <0.001  | -0.318               | -0.419, -0.217  | 0.39    |
| cSVD                                     | -0.099              | -0.206, 0.009   | 0.07    | 0.001                | -0.199, 0.201   | 0.99    |
| cSVD × Time                              | -0.040              | -0.082, 0.002   | 0.06    | -0.023               | -0.075, 0.029   | 0.39    |
| Executive function                       |                     |                 |         |                      |                 |         |
| Time                                     | 0.011               | -0.033, 0.056   | 0.62    | -0.018               | -0.104, 0.069   | 0.69    |
| cSVD                                     | 0.021               | -0.050, 0.092   | 0.56    | -0.110               | -0.330, 0.110   | 0.33    |
| cSVD × Time                              | -0.015              | -0.050, 0.019   | 0.39    | 0.027                | -0.017, 0.070   | 0.24    |
| Verbal fluency                           |                     |                 |         |                      |                 |         |
| Time                                     | 0.061               | 0.031, 0.091    | <0.001  | -0.003               | -0.058, 0.053   | 0.93    |
| cSVD                                     | -0.019              | -0.131, 0.094   | 0.74    | -0.048               | -0.216, 0.120   | 0.58    |
| cSVD × Time                              | -0.011              | -0.031, 0.009   | 0.30    | -0.008               | -0.035, 0.019   | 0.56    |
| Working memory                           |                     |                 |         |                      |                 |         |
| Time                                     | 0.042               | 0.008, 0.077    | 0.015   | 0.004                | -0.051, 0.059   | 0.89    |
| cSVD                                     | -0.021              | -0.145, 0.104   | 0.75    | 0.025                | -0.120, 0.171   | 0.73    |
| cSVD × Time                              | -0.005              | -0.028, 0.019   | 0.70    | 0.008                | -0.020, 0.035   | 0.58    |
| Verbal memory                            |                     |                 |         |                      |                 |         |
| Time                                     | 0.081               | 0.050, 0.112    | <0.001  | 0.126                | 0.055, 0.196    | <0.001  |
| cSVD                                     | -0.045              | -0.147, 0.058   | 0.39    | 0.112                | -0.047, 0.271   | 0.17    |
| cSVD × Time                              | 0.004               | -0.019, 0.026   | 0.76    | -0.037               | -0.074, -0.001  | 0.05    |
| Visual memory                            |                     |                 |         |                      |                 |         |
| Time                                     | -0.111              | -0.146, -0.077  | <0.001  | -0.126               | -0.186, -0.065  | <0.001  |
| cSVD                                     | -0.63               | -0.177, 0.051   | 0.28    | 0.039                | -0.097, 0.175   | 0.57    |
| cSVD × Time                              | -0.014              | -0.039, 0.011   | 0.28    | -0.007               | -0.037, 0.024   | 0.67    |
| <b>Gray matter volume (mL)</b>           |                     |                 |         |                      |                 |         |
| Attention and processing speed           |                     |                 |         |                      |                 |         |
| Time                                     | -0.046              | -0.193, 0.102   | 0.55    | -0.024               | -0.247, 0.200   | 0.84    |
| GMV                                      | 0.004               | 0.001, 0.007    | 0.02    | 0.005                | -0.001, 0.011   | 0.07    |
| GMV × Time                               | 0.0001              | -0.0001, 0.0004 | 0.36    | 0.0001               | -0.0004, 0.0005 | 0.90    |
| Visuospatial ability                     |                     |                 |         |                      |                 |         |

|                    |            |         |                 |      |         |                 |       |
|--------------------|------------|---------|-----------------|------|---------|-----------------|-------|
|                    | Time       | -0.387  | -0.800, 0.027   | 0.07 | -0.203  | -0.668, 0.263   | 0.40  |
|                    | GMV        | -0.001  | -0.004, 0.003   | 0.81 | 0.008   | 0.001, 0.015    | 0.02  |
|                    | GMV × Time | 0.0002  | -0.0006, 0.0009 | 0.71 | -0.0003 | -0.001, 0.0006  | 0.49  |
| Executive function |            |         |                 |      |         |                 |       |
|                    | Time       | -0.190  | -0.527, 0.146   | 0.27 | 0.109   | -0.282, 0.500   | 0.58  |
|                    | GMV        | 0.001   | -0.002, 0.003   | 0.73 | 0.007   | -0.001, 0.014   | 0.10  |
|                    | GMV × Time | 0.0003  | -0.0003, 0.0009 | 0.29 | -0.0002 | -0.0009, 0.0006 | 0.62  |
| Verbal fluency     |            |         |                 |      |         |                 |       |
|                    | Time       | 0.095   | -0.103, 0.292   | 0.35 | 0.100   | -0.139, 0.339   | 0.41  |
|                    | GMV        | 0.006   | 0.002, 0.010    | 0.35 | 0.010   | 0.004, 0.015    | 0.001 |
|                    | GMV × Time | -0.0001 | -0.0005, 0.0003 | 0.56 | -0.0003 | -0.0007, 0.0002 | 0.27  |
| Working memory     |            |         |                 |      |         |                 |       |
|                    | Time       | -0.030  | -0.260, 0.200   | 0.80 | 0.069   | -0.178, 0.315   | 0.59  |
|                    | GMV        | 0.002   | -0.002, 0.007   | 0.25 | 0.003   | -0.002, 0.008   | 0.30  |
|                    | GMV × Time | 0.0001  | -0.0003, 0.0005 | 0.60 | -0.0001 | -0.0006, 0.0003 | 0.62  |
| Verbal memory      |            |         |                 |      |         |                 |       |
|                    | Time       | 0.024   | -0.194, 0.241   | 0.83 | -0.024  | -0.351, 0.303   | 0.89  |
|                    | GMV        | 0.003   | -0.001, 0.007   | 0.07 | 0.004   | -0.001, 0.010   | 0.13  |
|                    | GMV × Time | 0.0001  | -0.0003, 0.0005 | 0.64 | 0.0002  | -0.0005, 0.0008 | 0.62  |
| Visual memory      |            |         |                 |      |         |                 |       |
|                    | Time       | -0.081  | -0.325, 0.163   | 0.51 | -0.215  | -0.489, 0.060   | 0.13  |
|                    | GMV        | 0.002   | -0.002, 0.006   | 0.28 | 0.005   | 0.001, 0.010    | 0.04  |
|                    | GMV × Time | -0.0001 | -0.005, 0.0004  | 0.71 | 0.0001  | -0.0004, 0.0007 | 0.64  |

Abbreviations: 95% CI, 95% confidence intervals; cSVD, cerebral small vessel disease; GMV, gray matter volume.
